# Supplementary material for: Cmr1 enables efficient RNA and DNA interference of a III-B CRISPR–Cas system by binding to target RNA and crRNA
Source: PubMed Central journal article supplement — Nucleic Acids Res. 2017 Sep 5;45(19):11305–14. doi: 10.1093/nar/gkx791 (PMC5737701; doi:10.1093/nar/gkx791), 2017-09-05
Supplement: gkx791_supp.pdf [file gkx791_supp.pdf]

## **Cmr1 enables efficient RNA and DNA interference of a III-B CRISPR-Cas system by binding to target RNA and crRNA**

Yingjun Li<sup>1,2#</sup>, Yan Zhang<sup>1#</sup>, Jinzhong Lin<sup>2</sup>, Saifu Pan<sup>1</sup>, Wenyuan Han<sup>2</sup>, Nan Peng<sup>1</sup>, Yun Xiang Liang<sup>1</sup> and Qunxin She<sup>1,2\*</sup>

1 State Key Laboratory of Agricultural Microbiology and College of Life Science and Technology, Huazhong Agricultural University, 430070 Wuhan, China

2 Archaea Centre, Department of Biology, University of Copenhagen, Ole Maaløes Vej 5, Copenhagen Biocenter, DK-2200 Copenhagen N, Denmark

\* To whom correspondence should be addressed. Tel. +45 3532 2013, Fax +45 3532 2128, email: qunxin@bio.ku.dk

# These authors contributed equally to this work.

### **Supplementary data:**

The file contains 4 tables and 6 figures.

**Table S1. *Sulfolobus* strains used in this work**

| <b>Strains</b>                                                     | <b>Genotype and features</b>                                                                                              | <b>Reference</b> |
|--------------------------------------------------------------------|---------------------------------------------------------------------------------------------------------------------------|------------------|
| <i>S. islandicus</i> E233                                          | $\Delta pyrEF$                                                                                                            | (1)              |
| <i>S. islandicus</i> $\Delta cmr\text{-}\beta(\Delta\beta)$        | Derived from E233, carrying deletion of IIIB Cmr- $\beta$ locus including 7 <i>cmr</i> - $\beta$ genes                    | (2)              |
| <i>S. islandicus</i> $\Delta Cmr1\alpha(\Delta\beta\Delta1\alpha)$ | Derived from $\Delta\beta$ E233, carrying deletion of <i>cmr1</i> $\alpha$ gene                                           | This work        |
| <i>S. islandicus</i> Cmr1 $\alpha$ -M1( $\Delta\beta1\alpha$ -M1)  | Derived from $\Delta\beta$ E233, carrying a double mutation (W58A, F59A) donor DNA of <i>cmr1</i> $\alpha$                | This work        |
| <i>S. islandicus</i> Cmr1 $\alpha$ -M2( $\Delta\beta1\alpha$ -M2)  | Derived from $\Delta\beta$ E233, carrying a quadruple mutation (I52A, G54A, R57A, R61A) donor DNA of <i>cmr1</i> $\alpha$ | This work        |

**Table S2. Plasmids used in this work**

| Plasmids                    | Genotype and features                                                                                                                                    | Reference |
|-----------------------------|----------------------------------------------------------------------------------------------------------------------------------------------------------|-----------|
| pSeSD1                      | A <i>Sulfolobus-E. coli</i> shuttle vector with an expression cassette controlled under ParaS-SD promoter                                                | (3)       |
| pSe-Rp                      | A <i>Sulfolobus</i> artificial mini-CRISPR cloning vector                                                                                                | (4)       |
| pAC-SS1                     | An artificial mini-CRISPR locus plasmid derived from pSe-Rp, carrying one spacer matching the protospacer 1 (SS1) of the <i>S. islandicus lacS</i> gene  | (4)       |
| pAC10-SS1                   | An artificial mini-CRISPR locus plasmid derived from pSe-Rp, carrying an artificial CRISPR locus with 10 S1 spacer of the <i>S. islandicus lacS</i> gene | (4)       |
| pS10i                       | An invader plasmid carrying a target sequence of spacer 10 in CRISPR locus 2 in <i>S. islandicus</i>                                                     | (5)       |
| pAC-cmr6 $\alpha$ -10His    | Derived from pAC, carrying His-tagged Cmr6 and mini-CRISPR locus with 10 S1 spacer                                                                       | This work |
| pGE- $\Delta$ Cmr1 $\alpha$ | A genome editing plasmid for deletion of the <i>cmr1<math>\alpha</math></i> gene in <i>S.islandicus</i>                                                  | This work |
| pGE-1 $\alpha$ -M1          | A genome editing plasmid for double mutation(W58A, F59A) of the <i>cmr1<math>\alpha</math></i> gene in <i>S.islandicus</i>                               | This work |
| pGE-1 $\alpha$ -M2          | A genome editing plasmid for quadruple mutation(I52A, G54A, R57A, R61A) of the <i>cmr1<math>\alpha</math></i> gene in <i>S.islandicus</i>                | This work |

**Table S3. Oligonucleotides used in this work**

| Oligonucleotide            | Sequence (5'-3')                                           |
|----------------------------|------------------------------------------------------------|
| 10His-replace-F            | GGCCGCACATCATCATCACCACCATCATCATCACCATTAAGCAAATCTTTTTTTTCCC |
| 10His-replace-R            | GGGAAAAAAAAAGATTTGCTTAATGGTGATGATGATGGTGGTGATGATGATGTGC    |
| MCS-fwd                    | ATGCCCCGGGATGTTAAACAAGTTAGG                                |
| MCS-rev                    | GGCACTCGAGAAAAAAAAAGATTTTGGCTTAATGGTG                      |
| $\Delta$ 1 $\alpha$ -SpF   | AAAGGTAGATTAAGATGGTTCTTAAGGACTGTATATAATAGATT               |
| $\Delta$ 1 $\alpha$ -SpR   | TAGCAATCTATTATATACAGTCCTTAAGAACCATCTTAATCTAC               |
| $\Delta$ 1 $\alpha$ -SOEF  | TTGCACTGTTTACTGATAGAAGTAAATCCGTTATAATCCC                   |
| $\Delta$ 1 $\alpha$ -SOER  | GATTATAACGGATTTACTTCTATCAGTAAACAGTGCAAAG                   |
| $\Delta$ 1 $\alpha$ -SalIF | ACGCGTCGACCTCAAGCAAGCCTGGATTAG                             |
| $\Delta$ 1 $\alpha$ -NotIR | AAGGAAAAAGCGGCCGCTTTTCTACTCCATTGG                          |
| $\Delta$ 1 $\alpha$ -PCR-F | AACTGCAAATTGCCAAAT                                         |
| $\Delta$ 1 $\alpha$ -PCR-R | GAGGGTCGTGGAAATAGCT                                        |
| Q <sub>Tar</sub> -F        | GTAATCGACAATGAACGAAC                                       |
| Q <sub>Tar</sub> -R        | GAAACGCTCTTTATTCCATC                                       |
| Q <sub>Ref</sub> -F        | AGCAGGATTACCAACAAGTG                                       |
| Q <sub>Ref</sub> -R        | CATCCGCAATACCGTTTTT                                        |
| lacS-RT-R                  | AGGTCTTTGATAATCTGCATC                                      |
| 1 $\alpha$ -M1-SpF         | AAAGGTAGATTAAGATGGTTCTTAAGGACTGTATATAATAGATT               |
| 1 $\alpha$ -M1-SpR         | TAGCAATCTATTATATACAGTCCTTAAGAACCATCTTAATCTAC               |
| 1 $\alpha$ -M1-SOEF        | AAGACGCTCTTAATCTACCCACTATTTCTTCTTCGTCAAC                   |
| 1 $\alpha$ -M1-SOER        | AGTGGGTAGATTAAGAGCGGCTTTAAGGACTGTATATAAT                   |
| 1 $\alpha$ -M2-SpF         | AAAGGTAGATTAAGATGGTTCTTAAGGACTGTATATAATAGATT               |
| 1 $\alpha$ -M2-SpR         | TAGCAATCTATTATATACAGTCCTTAAGAACCATCTTAATCTAC               |
| 1 $\alpha$ -M2-SOEF        | AGCTAAGAACCATGCTAATCTAGCCACTGCTTCTTCTTCGTCAAC              |
| 1 $\alpha$ -M2-SOER        | GCAGTGGCTAGATTAGCATGGTTCTTAGCTACTGTATATAAT                 |
| 1 $\alpha$ -M-SalIF        | ACGCGTCGACCTCAAGCAAGCCTGGATTAG                             |
| 1 $\alpha$ -M-NotIR        | AAGGAAAAAGCGGCCGCTATAGAGTCTTCAGAAGTTT                      |

**Table S4. Nucleic acid substrates used in this work**

| <b>Name</b> | <b>Sequence (5'-3')</b>                                         | <b>Size (mer)</b> |
|-------------|-----------------------------------------------------------------|-------------------|
| <b>RNA</b>  |                                                                 |                   |
| SS1-46      | UGUUAAGUCUGGUUCCCUCCAGGGUAUCUAAGCUUUGAAAAAAAA                   | 46                |
| <b>DNA</b>  |                                                                 |                   |
| S10         | ACTATAGGGAGAATAGAATGCCCCATTATACAATATCTACGTTTTAGATGACCCCCC<br>CC | 60                |



## Supplementary figures

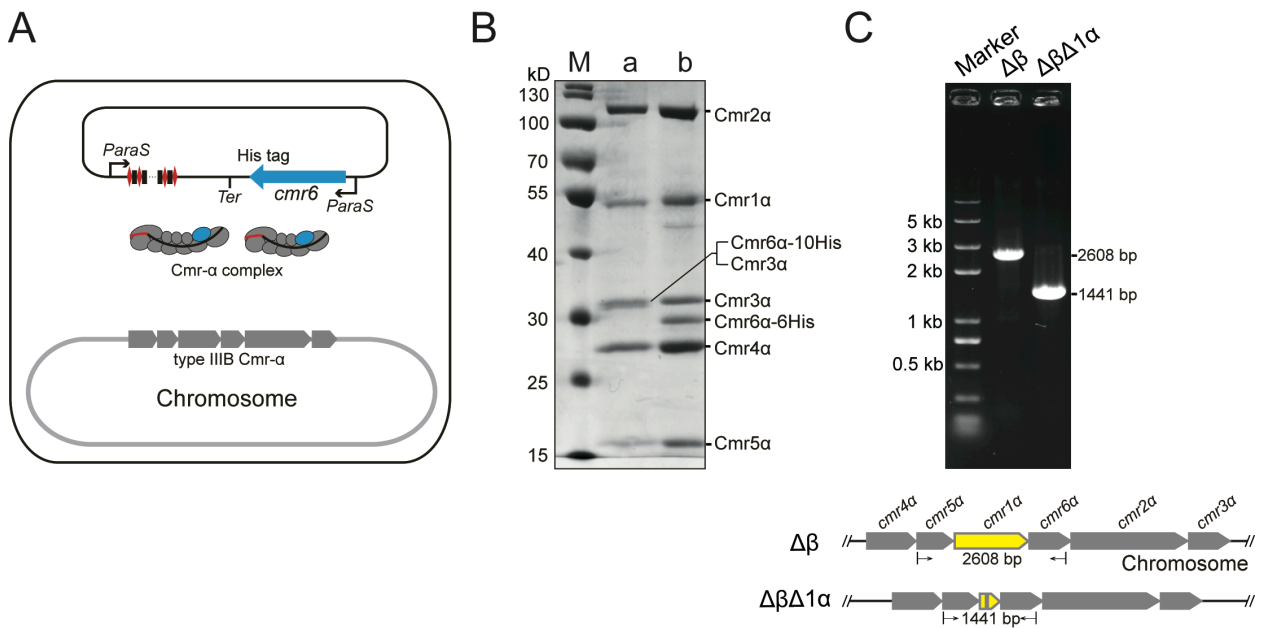

Figure S1

- (A) Strategy for copurification of native Cmr- $\alpha$  complex using pAC-cmr6 $\alpha$ -10His plasmid, a 10 $\times$ His tag has substituted the 6 $\times$ His tag that used in our previous study(6).
- (B) SDS-PAGE of purified Cmr- $\alpha$  complex with 10 $\times$ His-cmr6 $\alpha$ (a) and 6 $\times$ His-cmr6 $\alpha$ (b).
- (C) PCR verification of Cmr1 $\alpha$  deletion mutant.

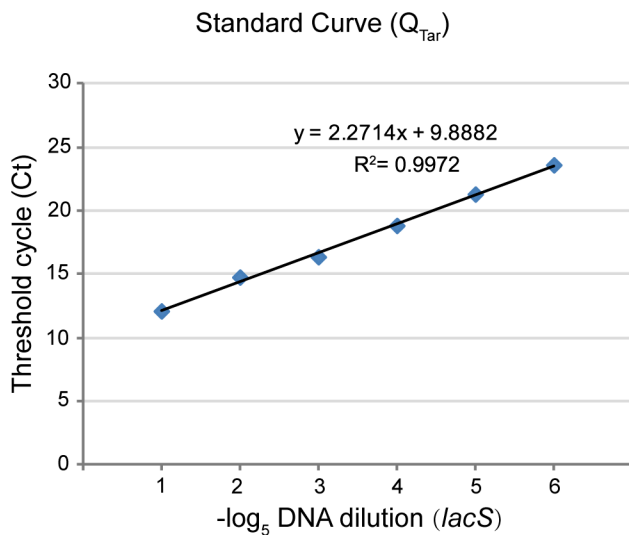

$$\text{slope} = 1/\log_5 E$$

$$E = 5^{1/\text{slope}}$$

$$E(Q_{\text{Tar}}) = 5^{1/2.2714} = 2.03$$

$$E(Q_{\text{Ref}}) = 5^{1/2.2635} = 2.04$$

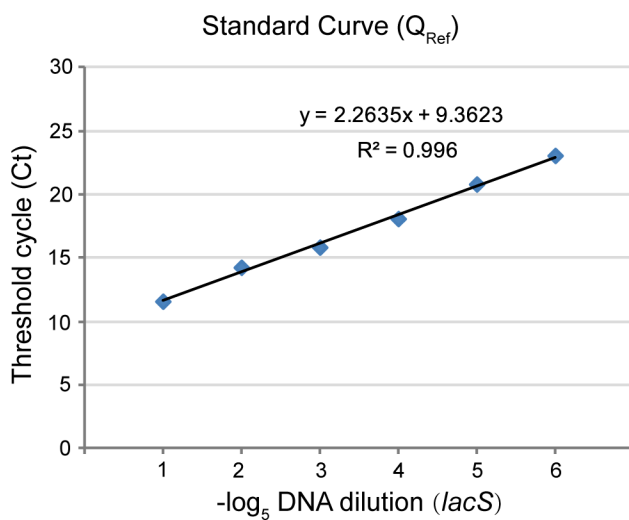

Figure S2 . qPCR standardization – determination of amplification efficiency for Q<sub>Tar</sub> and Q<sub>Ref</sub> primer sets.

Standard curves were generated with five-fold series diluted template (plasmid DNA containing *lacS*) . Slope was determined as linear regression of Ct (y-axis) versus  $-\log_5$  DNA dilution (x-axis). Efficiency of amplification for primer sets were calculated using the following equation: efficiency  $E = 5^{1/\text{slope}}$ , being  $E(Q_{\text{Tar}}) = 2.03$  and  $E(Q_{\text{Ref}}) = 2.04$ .

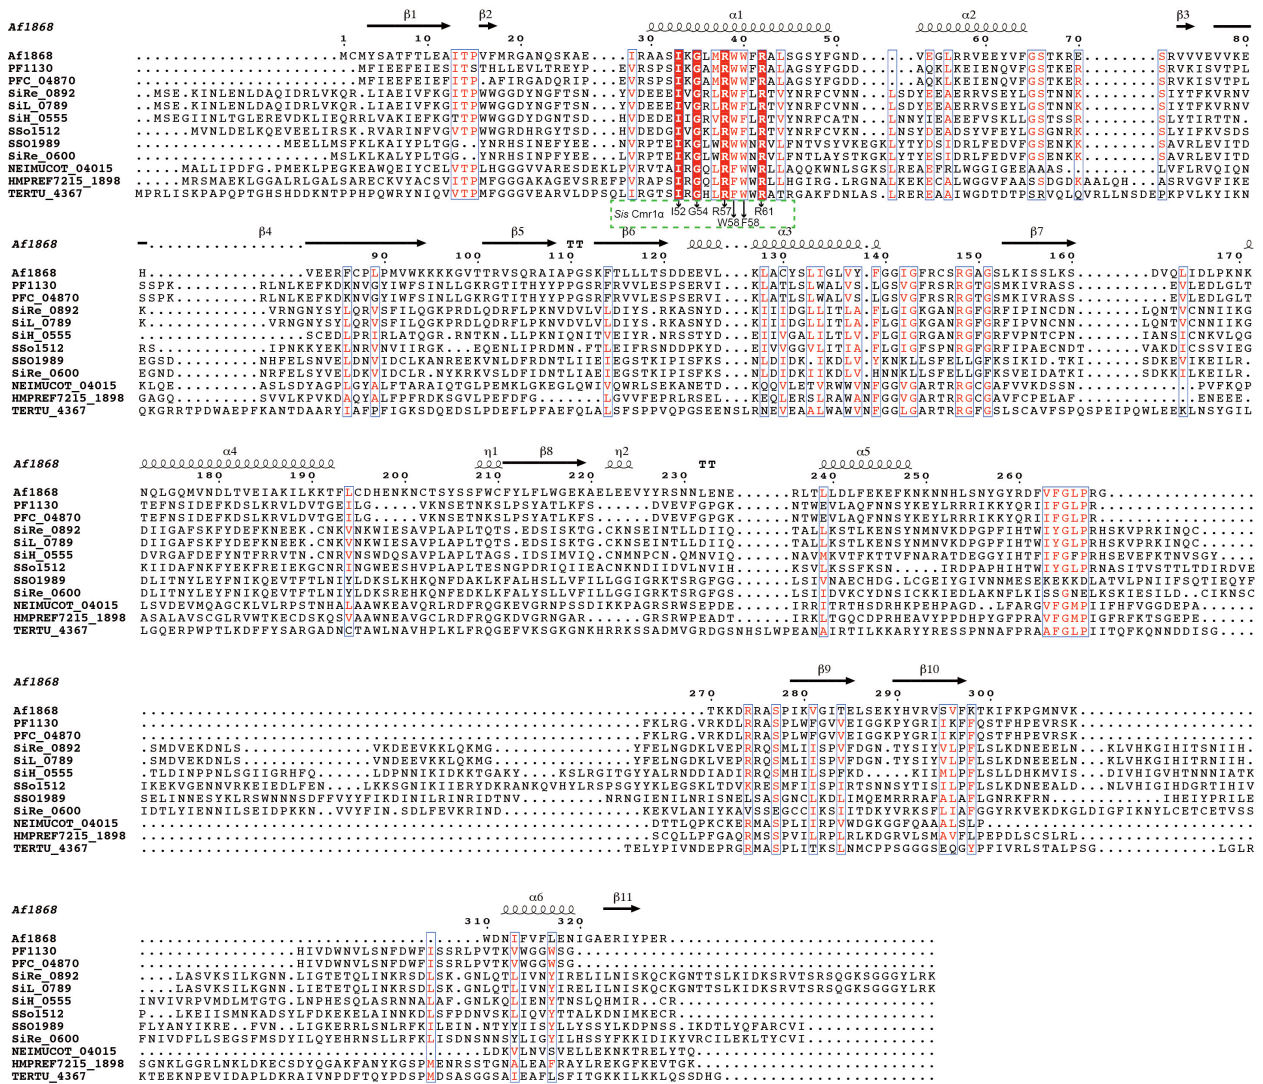

Figure S3. Sequence alignment of Cmr1 homologs.

Twelve homologues (Af1868, PF1130, PFC\_04870, SiRe\_0892, SiL\_0789, SiH\_0555, SSo1512, SSo1989, SiRe\_0600, NEIMUCOT\_04015, HMPREF7215\_1898 and TERTU\_4367) were selected and aligned using ESPrnt 3.x (<http://esprnt.ibcp.fr>) (7). Six highly conserved residues at N-termini were chosen to produce two Cmr1 $\alpha$  mutants which were defined as follows: Cmr1 $\alpha$ -M1 (W58A, F59A), Cmr1 $\alpha$ -M2 (I52A, G54A, R61A).

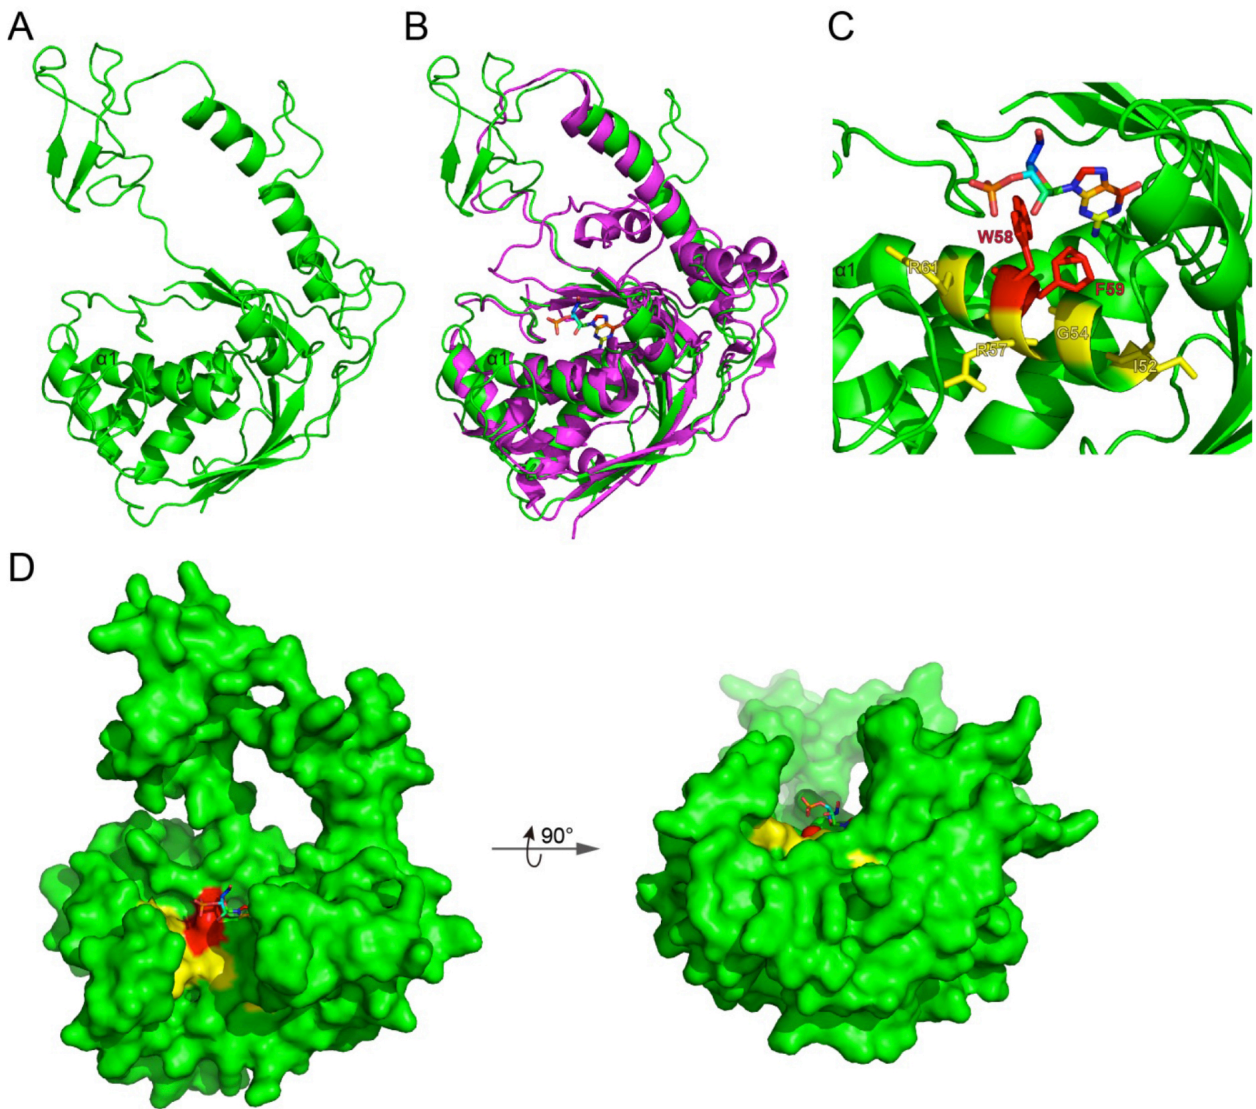

Figure S4. Structure model of *S. islandicus* Cmr1α

- (A) Structural model of *S. islandicus* Cmr1α generated by SWISS-MODEL(8-11).
- (B) The structures of *Sis* Cmr1α and *Pf* Cmr1(4W8X) are superimposed. A adenine ribonucleotide binds in the conserved groove.
- (C) A zoom shows the ribonucleotide binding groove. Conserved residues mutated in this study are indicated in red(W58, F59) and yellow(I52, G54, R57, R61).
- (D) Surface representation of Cmr1α and stereoview of the interaction between Cmr1α and bound ribonucleotide.

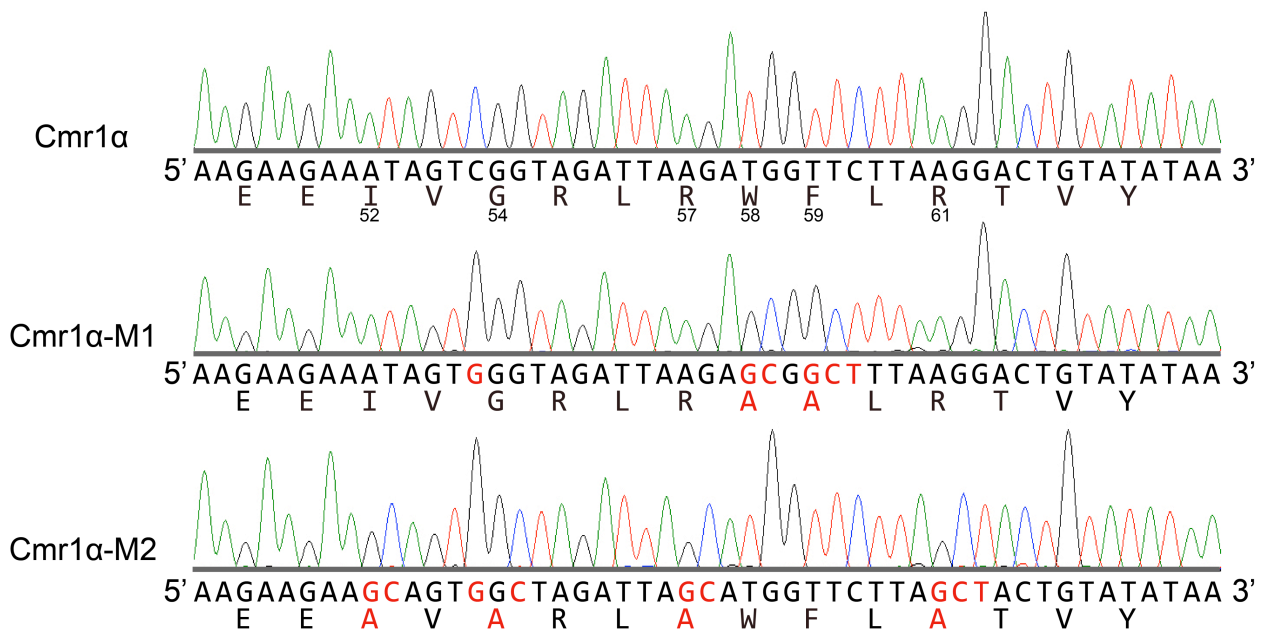

Figure S5. Sequencing results of *S. islandicus* *cmr1α* mutant genes

Chromatographs of the sequencing data generated from Sanger DNA sequencing. Mutated bases as well as the mutated amino acids are highlighted in red.



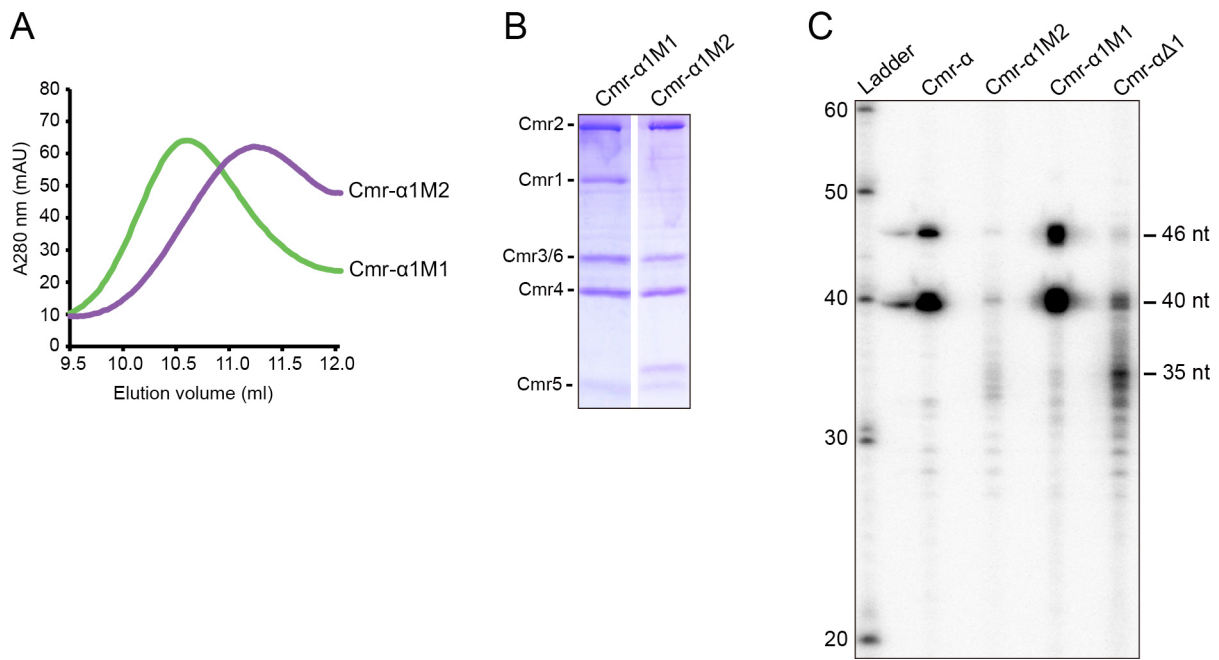

Figure S6

(A) Gel filtration profiles of Cmr- $\alpha$ 1M1 (green) and Cmr- $\alpha$ 1M2 (purple). A<sub>280</sub>: UV absorbance at 280 nm.

(B) SDS-PAGE of purified Cmr- $\alpha$ 1M1 and Cmr- $\alpha$ 1M2 complexes.

(C) Denaturing gel electrophoresis analysis of crRNAs present in Cmr- $\alpha$ , Cmr- $\alpha$  $\Delta$ 1, Cmr- $\alpha$ 1M1 and Cmr- $\alpha$ 1M2 complexes.

## REFERENCES

1. Deng, L., Zhu, H., Chen, Z., Liang, Y.X. and **She, Q.** (2009) Unmarked gene deletion and host-vector system for the hyperthermophilic crenarchaeon *Sulfolobus islandicus*. *Extremophiles : life under extreme conditions*, **13**, 735-746.
2. Li, Y., Pan, S., Zhang, Y., Ren, M., Feng, M., Peng, N., Chen, L., Liang, Y.X. and **She, Q.** (2016) Harnessing Type I and Type III CRISPR-Cas systems for genome editing. *Nucleic acids research*, **44**, e34.
3. Peng, N., Deng, L., Mei, Y., Jiang, D., Hu, Y., Awayez, M., Liang, Y. and **She, Q.** (2012) A synthetic arabinose-inducible promoter confers high levels of recombinant protein expression in hyperthermophilic archaeon *Sulfolobus islandicus*. *Applied and environmental microbiology*, **78**, 5630-5637.
4. Peng, W., Feng, M., Feng, X., Liang, Y.X. and **She, Q.** (2015) An archaeal CRISPR type III-B system exhibiting distinctive RNA targeting features and mediating dual RNA and DNA interference. *Nucleic acids research*, **43**, 406-417.
5. Deng, L., Garrett, R.A., Shah, S.A., Peng, X. and She, Q. (2013) A novel interference mechanism by a type IIIB CRISPR-Cmr module in *Sulfolobus*. *Mol Microbiol*, **87**, 1088-1099.
6. Han, W., Li, Y., Deng, L., Feng, M., Peng, W., Hallstrom, S., Zhang, J., Peng, N., Liang, Y.X., White, M.F. *et al.* (2017) A type III-B CRISPR-Cas effector complex mediating massive target DNA destruction. *Nucleic Acids Res*, **45**, 1983-1993.
7. Robert, X. and Gouet, P. (2014) Deciphering key features in protein structures with the new ENDscript server. *Nucleic Acids Res*, **42**, W320-324.
8. Arnold, K., Bordoli, L., Kopp, J. and Schwede, T. (2006) The SWISS-MODEL workspace: a web-based environment for protein structure homology modelling. *Bioinformatics*, **22**, 195-201.
9. Guex, N., Peitsch, M.C. and Schwede, T. (2009) Automated comparative protein structure modeling with SWISS-MODEL and Swiss-PdbViewer: a historical perspective. *Electrophoresis*, **30 Suppl 1**, S162-173.
10. Kiefer, F., Arnold, K., Kunzli, M., Bordoli, L. and Schwede, T. (2009) The SWISS-MODEL Repository and associated resources. *Nucleic Acids Res*, **37**, D387-392.
11. Biasini, M., Bienert, S., Waterhouse, A., Arnold, K., Studer, G., Schmidt, T., Kiefer, F., Gallo Cassarino, T., Bertoni, M., Bordoli, L. *et al.* (2014) SWISS-MODEL: modelling protein tertiary and quaternary structure using evolutionary information. *Nucleic Acids Res*, **42**, W252-258.
